# Supplementary material
Source: publisher site journal article supplement (https://www.spandidos-publications.com/7772/downloadSupplementary)
Supplement: Supplementary file 1 [file downloadSupplementary]

**Table S1.** SFN methylation, clinical outcomes and detection methods in different cancer types.

| Cancer type                                      | Methylation frequency                | Related clinical outcomes                                                                                                                                                                                                                  | Detection method               | (Refs.)       |
|--------------------------------------------------|--------------------------------------|--------------------------------------------------------------------------------------------------------------------------------------------------------------------------------------------------------------------------------------------|--------------------------------|---------------|
| Breast cancer                                    | >90%                                 | i) Methylation leads to G2/M phase arrest defects and promotes tumor progression.<br>ii) Serum methylation can be used as a screening marker for metastatic breast cancer and as a monitor for treatment response.                         | Methylation-specific PCR assay | (32,33,35,36) |
| Gastric cancer                                   | 43% (primary)                        | SFN plays an important role in the proliferation and metastasis of gastric cancer cells                                                                                                                                                    | Bisulfite-SSCP assay           | (89,90)       |
| Lung cancer (non-small cell lung cancer)         | 64.6-100%                            | i) Methylation leads to G2/M phase arrest defects and promotes tumor progression.<br>ii) Serum methylation can be used as a diagnostic marker.<br>iii) Methylation leads to cisplatin resistance, which is related to the TRIM25 pathway.  | Methylation-specific PCR assay | (34,41,42)    |
| Ovarian cancer                                   | Hypermethylation (low expression)    | SFN methylation as a marker was found to be associated with ovarian cancer but unable to predict patient outcomes.                                                                                                                         | Methylation-specific PCR assay | (55)          |
| Pancreatic cancer                                | Hypomethylation (high expression)    | i) High expression of SFN is related to gemcitabine resistance.<br>ii) Methylation level is negatively correlated with survival rate.                                                                                                      | Methylation-specific PCR assay | (76,79,80)    |
| Nasopharyngeal carcinoma                         | 63%                                  | i) SFN expression is related to overall survival.<br>ii) Regulates epithelial-mesenchymal transition through miR-597 and miR-675-5p.<br>iii) Inhibits nasopharyngeal carcinoma cell invasion through the SFN/EGFR/keratin-8 signaling axis | Methylation-specific PCR assay | (58,59,60,61) |
| Squamous cell carcinoma (vulvar/esophageal/oral) | 53% (vulvar squamous cell carcinoma) | SFN is downregulated through DNA methylation, thereby promoting the progression of vulvar squamous cell carcinoma.                                                                                                                         | Methylation-specific PCR assay | (63,64)       |
| Kidney cancer                                    | 87.5%                                | Influences cell cycle regulation, enabling tumor cells to escape DNA damage caused by cisplatin and further promote tumor cell proliferation.                                                                                              | Methylation-specific PCR assay | (49,50)       |
| Gallbladder cancer                               | 90%                                  | Low expression of SFN may promote progression.                                                                                                                                                                                             | Methylation-specific PCR assay | (75)          |

SFN; 14-3-3 $\sigma$ ; SSCP, single-strand conformation polymorphism; TRIM25, tripartite motif containing 25; miR, micro RNA.
